# Supplementary material
Source: ML conference proceedings conference paper supplement (https://openaccess.thecvf.com/content/CVPR2025/html/Wu_InteractionMap_Improving_Online_CVPR_2025_paper.html)
Supplement: Supplementary file 1 [file Wu_InteractionMap_Improving_Online_CVPR_2025_supplemental.pdf]

# InteractionMap: Improving Online Vectorized HDMap Construction with Interaction

## Supplementary Material

In this supplementary file, we provide additional qualitative visual results of the proposed InteractionMap due to space limitation.

### A. Qualitative Visualization

We visualize results of InteractionMap in sequential frames. The visual results under the weather conditions of cloudy, sunny and rainy are shown in Figures 1 and 2, Figures 3 and 4, Figures 5 and 6, respectively. And the visual results under the lighting condition of nighttime are shown in Figures 7 and 8.

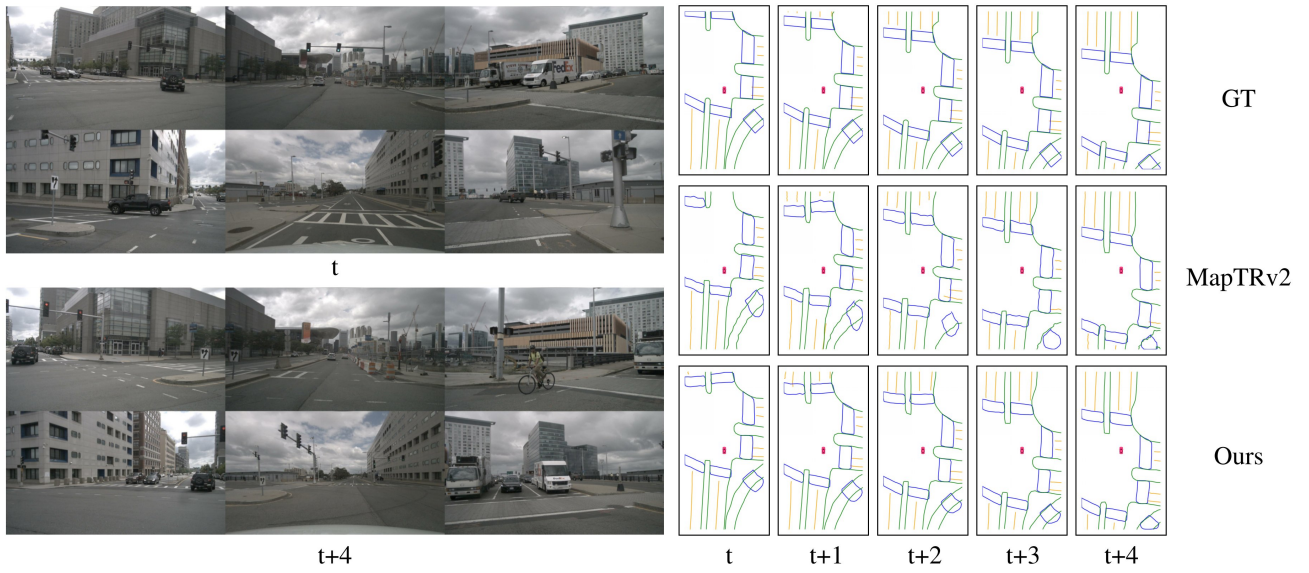

Figure 1. The visual results under the weather condition of cloudy.

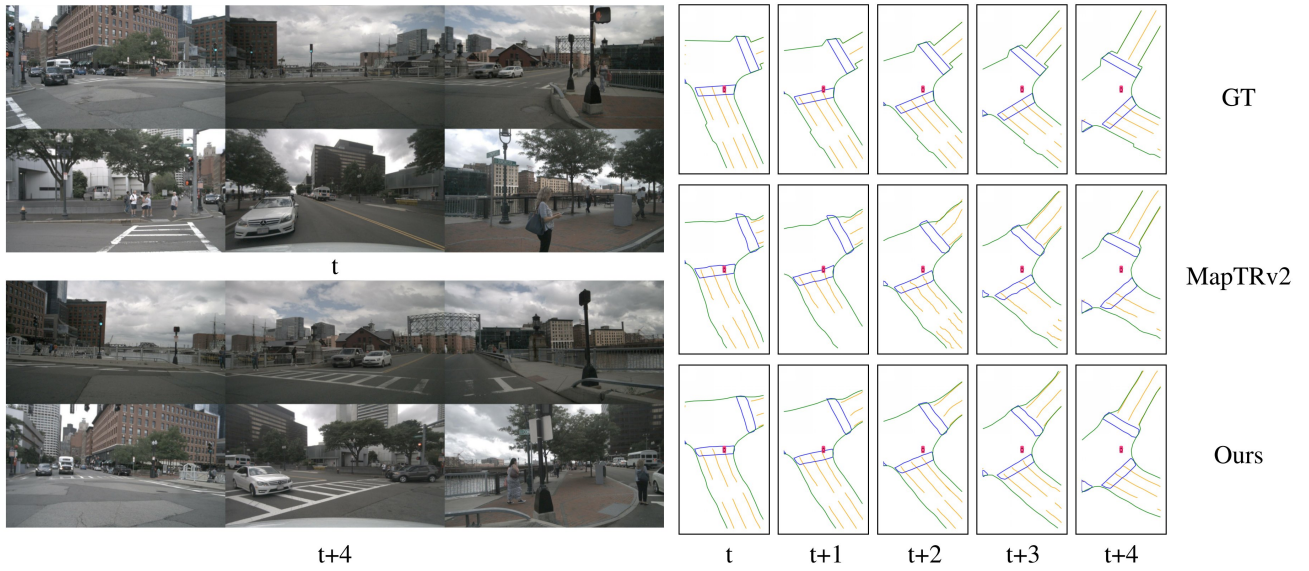

Figure 2. The visual results under the weather condition of cloudy.

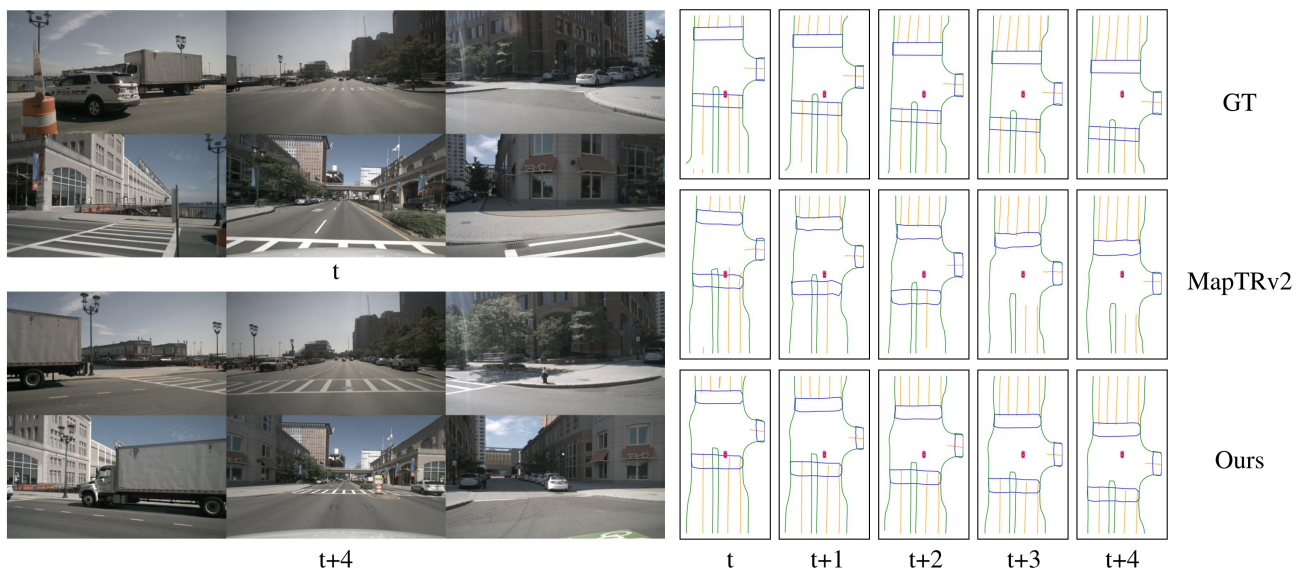

Figure 3. The visual results under the weather condition of sunny.

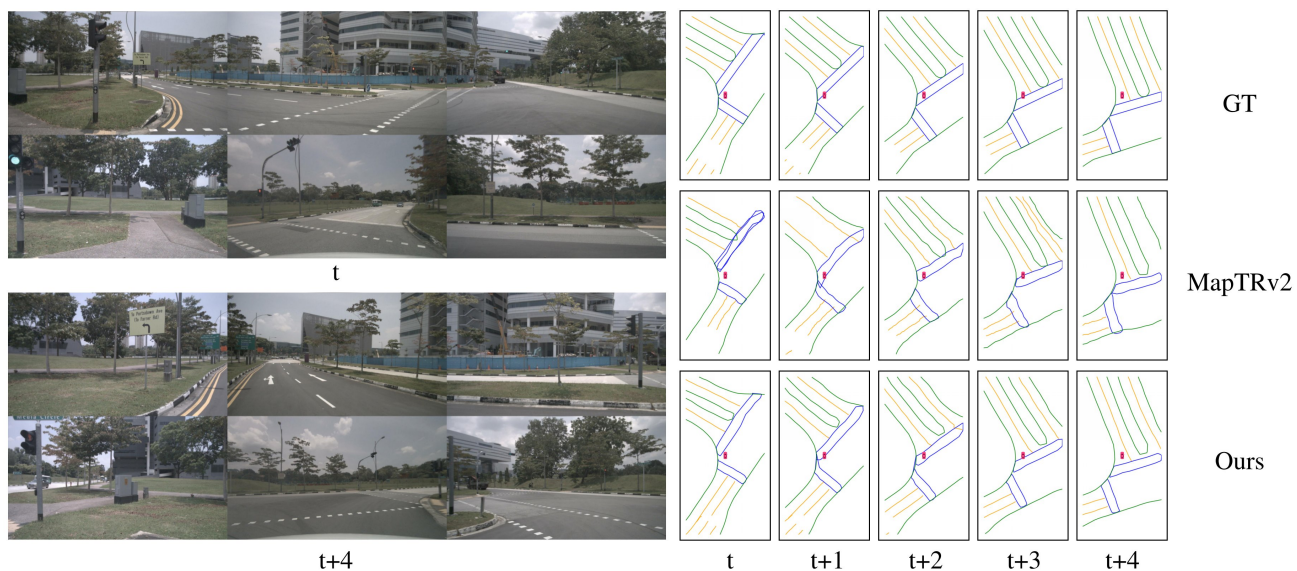

Figure 4. The visual results under the weather condition of sunny.



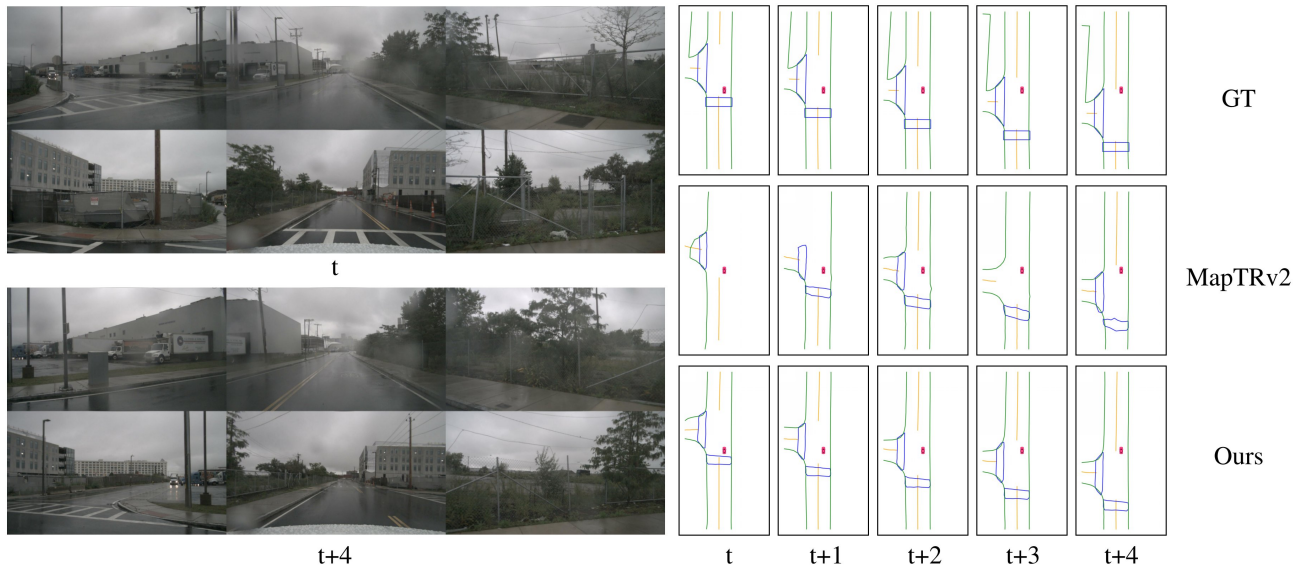

Figure 5. The visual results under the weather condition of rainy.

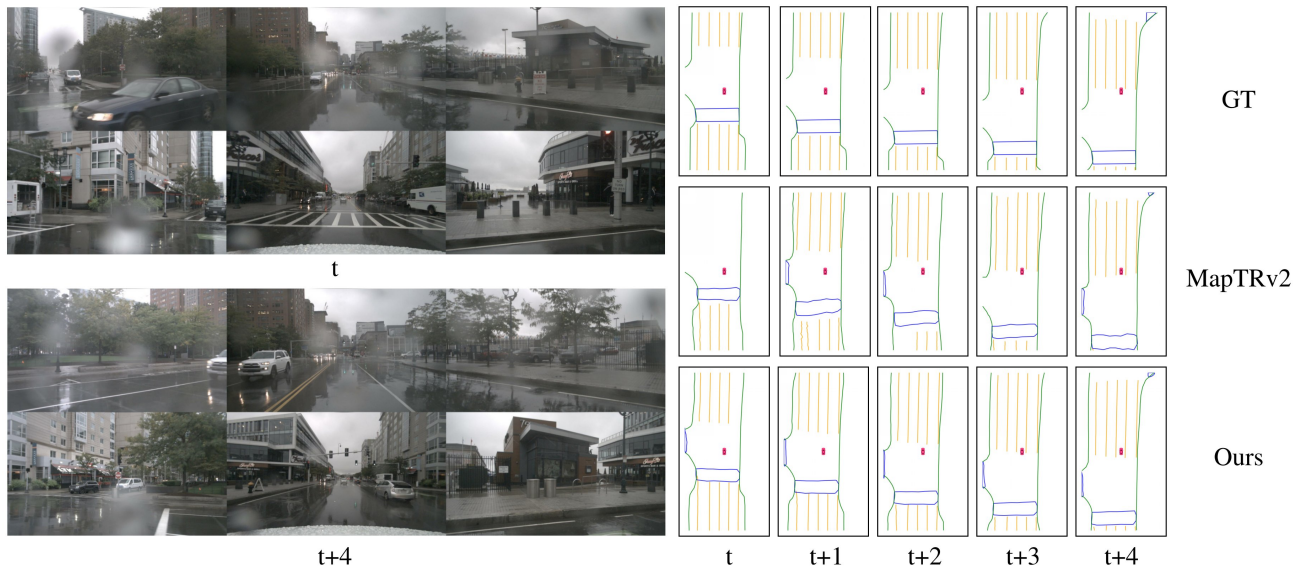

Figure 6. The visual results under the weather condition of rainy.

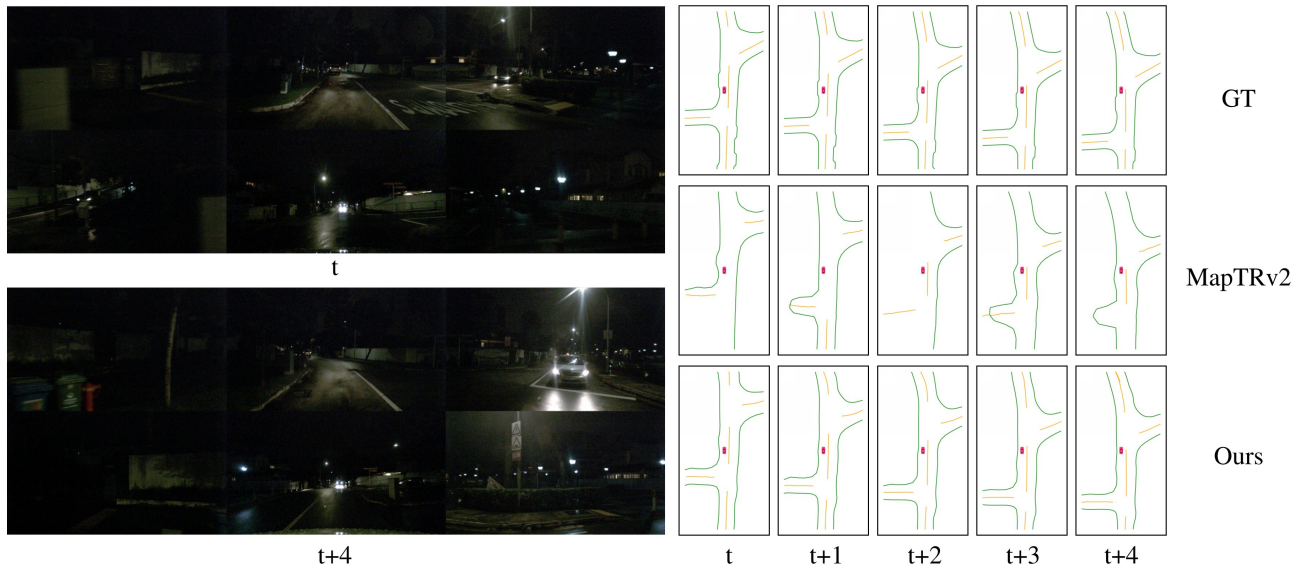

Figure 7. The visual results under the lighting condition of nighttime.

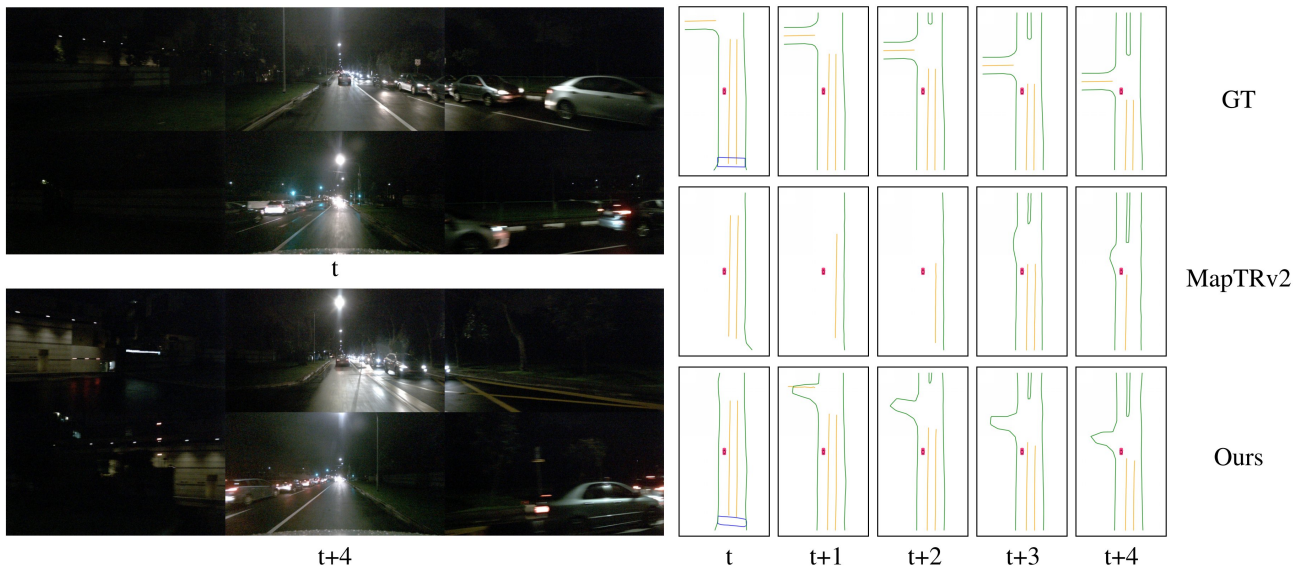

Figure 8. The visual results under the lighting condition of nighttime.
